# Supplementary material
Source: MDPI journal article supplement (https://www.mdpi.com/1999-4907/12/12/1615)
Supplement: s1 [file s1]

## **Electronic supplementary materials**

**Title:** Targeted CRISPR/Cas9-based knock-out of the rice orthologs *TILLER ANGLE*

*CONTROL 1 (TAC1)* in poplar induced erect leaf habit and shoot growth

### **Author:**

Matthias Fladung

Thünen Institute of Forest Genetics, Sieker Landstrasse 2, 22927 Grosshansdorf, Germany.

### **Journal:**

Forests

### **Corresponding author:**

Matthias Fladung, Thuenen-Institute of Forest Genetics, Sieker Landstraße 2, 22927

Grosshansdorf, Germany.

Tel: +49 4102 696 0

Fax: +49 4102 696 200

E-mail: [matthias.fladung@thuenen.de](mailto:matthias.fladung@thuenen.de)

### **Content:**

**Figure S1**

**Table S1**

**Table S2**

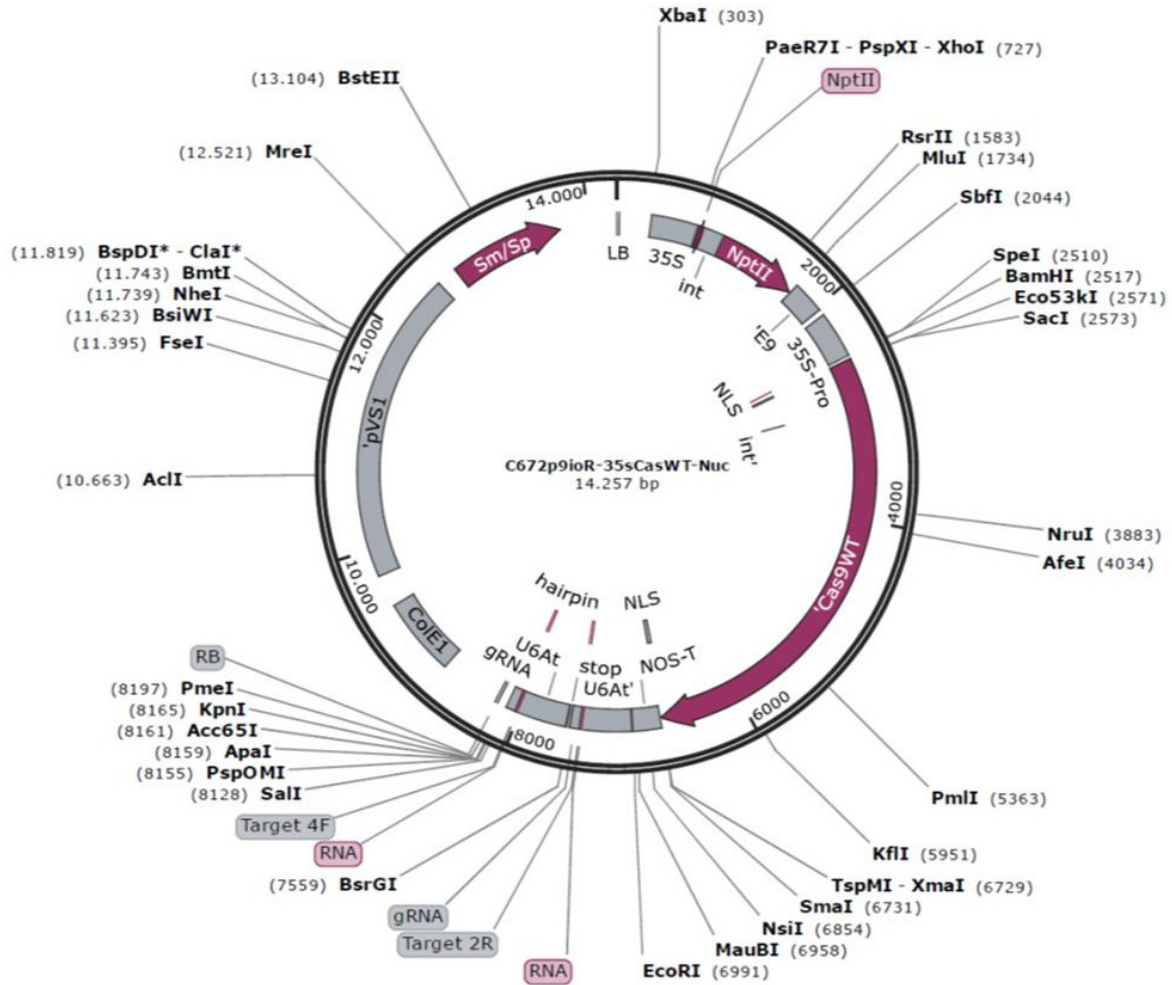

**Figure S1:** C672p9ioR-35sCasWT-Nuc plasmid (14.257 bp) (sequence is available by DNA Cloning Service, Hamburg, Germany, upon request) for knockout of the homologous rice ortholog *TILLER ANGLE CONTROL 1* (*TAC1*) in poplar, namely Potri.014G102600 ("TAC-14"), and its paralog Potri.002G175300 ("TAC-2") in the *P. × canescens* clone INRA 717-1B4.

Inside of the ring: LB: left border; 35S: cauliflower mosaic virus 35S promoter; Int: StLS1 (*Solanum tuberosum* rbcL-large subunit 1)-intron; NptII: coding sequence of kanamycin resistance gene; 'E9: terminator Rbcs-E9; 35S-Pro: cauliflower mosaic virus 35S promoter region; 'Cas9WT: Cas9 coding sequence of Cas9 wildtype gene (*Streptococcus pyogenes*); NLS: Nuclear localization sequence, for Cas9 sequence including NLS [55]; NOS-T: nopaline synthase terminator; U6At/U6At': coding U6 promoter (*Arabidopsis thaliana*) followed by gRNA sequence; RB: right border of T-DNA; ColE1: origin of replication; 'pVS1: origin of replication in *A. tumefaciens*; Sm/Sp: coding sequence of streptomycin/spectinomycin resistance gene.

Outside of the ring: Positions of gRNAs (RNA), and Targets 4F and 2R as well as of the restriction site (bp) of various restriction enzymes are given.

**Table S1:** Putative *PpeTAC1* (EMBL acc.no. KF218366; [43]) homologous genes in *P. trichocarpa*. To find homologous sequences in *P. × canescens* (*P. tremula* × *P. alba*, clone INRA 717-1B4 or P1), and *P. tremula* v1.1 (PopGenIE), transcript sequences of the two *P. trichocarpa* genes were blasted against <https://urgi.versailles.inra.fr/blast/blastresult.php?pathJob=2&jobid=160431359012&opt=none> and <http://popgenie.org/blast>. \*Transcript sequence of Potri.014G102600 was blasted; \*\*Transcript sequence of Potri.002G175300 was blasted.

| <u>Species</u>        | <u>Gene/sequence ID</u> | <u>Score</u> | <u>E-value</u>        |
|-----------------------|-------------------------|--------------|-----------------------|
| <i>P. trichocarpa</i> | Potri.014G102600        | 183.4        | 8.7 e <sup>-44</sup>  |
|                       | Potri.002G175300        | 172.6        | 1.6 e <sup>-40</sup>  |
| <i>P. × canescens</i> | scaffold_37509*         | 1052         | 0.0                   |
|                       | scaffold_1688*          | 1052         | 0.0                   |
|                       | scaffold_72118*         | 1047         | 0.0                   |
|                       | scaffold_170684*        | 944          | 0.0                   |
|                       | scaffold_333464*        | 773          | 0.0                   |
|                       | scaffold_74020*         | 639          | 0.0                   |
|                       | scaffold_47155*         | 639          | 0.0                   |
|                       | scaffold_333464**       | 1106         | 0.0                   |
|                       | scaffold_47155**        | 933          | 0.0                   |
|                       | scaffold_74020**        | 928          | 0.0                   |
|                       | scaffold_72118**        | 764          | 0.0                   |
|                       | scaffold_37509**        | 753          | 0.0                   |
|                       | scaffold_1688**         | 753          | 0.0                   |
|                       | scaffold_170684**       | 679          | 0.0                   |
|                       |                         |              |                       |
| <i>P. tremula</i>     | Potra003475*            | 506.7        | 3.98 e <sup>-16</sup> |
|                       | Potra001079*            | 237.9        | 7.28 e <sup>-14</sup> |
|                       | Potra001079**           | 465.7        | 1.52 e <sup>-18</sup> |
|                       | Potra003475**           | 229.5        | 6.78 e <sup>-14</sup> |

**Table S2:** Primers used in this study to amplify the *Cas9*, *NPT-II*, “TAC-14”, and “TAC-2” genes in PCR-reactions and for Sanger-sequencing.

| <u>Gene</u>   | <u>Primer name</u> | <u>Sequence (5'... 3')</u>    | <u>Annealing temperature</u> | <u>Expected amplicon size</u> |
|---------------|--------------------|-------------------------------|------------------------------|-------------------------------|
| <i>Cas9</i>   | f-Cas9             | GCT CCA GAC AAG AAG TAC AGC   | 58 °C                        | ~930 bp                       |
|               | r-Cas9             | TGT TCA CGC GAA GGA TGT CG    |                              |                               |
| <i>NPT-II</i> | f-nptII            | TTG AAC AAG ATG GAT TGC ACG   | 60 °C                        | ~960 bp                       |
|               | r-nptII            | AAG AAG GCG ATA GAA GGC GA    |                              |                               |
| “TAC-14”      | f-Potri14          | ATG GGC TAG CTA GAA ATG TG    | 56 °C                        | ~500 bp                       |
|               | r-Potri14          | CCT GAT TTG GTC TCA ATT TCA   |                              |                               |
| “TAC-2”       | f-Potri2           | AGA TGG GCT CGC TGG AAA TGT G | 63 °C                        | ~550 bp                       |
|               | r-Potri2           | CCT GGT TCA GTC TCA ACT TCA   |                              |                               |
